# Supplementary material for: Using cluster analysis for grouping partial autosomal haplotypes derived from single sperm STR profiling
Source: Springer Nature journal article supplement (doi:10.1007/s00194-023-00673-6), 2024-01-02
Supplement: MOESM1 [file 26582230]

| Sample       | Method |         |       |       |       |          |         |         |        |         |         |         |
|--------------|--------|---------|-------|-------|-------|----------|---------|---------|--------|---------|---------|---------|
|              |        | D3S1358 | VWA   | FIBRA | THO1  | SE33     | D8S1179 | D21S11  | D18S51 | D16S539 | D2S1338 | D19S433 |
| D1 Reference | ESX30  | 13 / 17 | 16/18 | 19/22 | 7/9.3 | 18/ 27.2 | 10/15   | 28/31.2 | 12/16  | 11/12   | 18/22   | 14/15   |
| D1 SC1       | ESX32  | 17      | 16    | 22    |       | 27,2     | 14      | 31,2    | 16     | 11      | 22      | 14      |
| D1 SC2       | ESX32  | 13      | 16    |       | 7     | 18       | 10      | 28      |        |         | 22      | 14      |
| D1 SC3       | ESX32  |         |       |       |       | 12       |         |         |        |         |         |         |
| D1 SC4       | ESX32  | 13      | 18    |       | 9,3   | 27,2     | 10      |         | 16     | 12      | 22      | 15      |
| D1 SC5       | ESX32  | 17      |       |       |       |          |         |         |        |         |         |         |
| D1 SC6       | ESX32  | 13      | 16    | 22    |       | 18       | 15      | 28      | 12     | 12      |         | 15      |
| D1 SC7       | ESX32  | 13      |       | 22    |       |          | 10      | 28      | 16     |         |         |         |
| D1 SC8       | ESX32  | 17      | 16    | 19    |       | 27,2     | 10      |         | 12     |         |         | 15      |
| D1 SC9       | ESX32  | 15      | 18    | 19    | 7     | 18       | 10      | 31,2    | 16     | 11      | 22      |         |
| D1 SC10      | ESX32  | 17      | 16    | 19    |       |          | 15      | 31,2    |        |         | 18      | 14      |
| D1 SC11      | ESX32  | 17      | 16    |       |       | 18       | 15      | 31,2    |        |         |         | 15      |
| D1 SC12      | ESX32  | 18      | 19    |       |       |          |         |         |        |         | 25      |         |
| D1 SC13      | ESX32  | 13      | 16    | 19    | 7     | 27,2     | 15      | 28      | 16     | 12      | 22      | 15      |
| D1 SC14      | ESX32  | 13      | 16    | 22    | 9,3   | 18       | 10      | 31,2    | 12     | 11      | 17      | 15      |
| D1 SC15      | ESX32  | 13      | 16    | 19    | 7     |          | 10      |         | 12     | 11      |         |         |
| D1 SC16      | ESX32  | 13      | 16    |       | 9,3   | 27,2     | 15      | 28      |        | 12      |         | 15      |
| D1 SC17      | ESX32  |         | 18    | 22    |       |          | 15      |         |        |         |         | 15      |
| D1 SC18      | ESX32  |         | 18    | 22    | 7     | 18       | 15      |         | 15     | 12      | 18      | 14      |
| D1 SC19      | ESX32  | 13      | 18    |       | 9,3   |          | 15      | 31,2    | 16     | 12      |         | 14      |
| D1 SC20      | ESX32  | 17      |       |       |       |          | 10      | 28      | 16     | 12      | 18      | 15      |
| D1 SC21      | ESX32  |         | 18    | 22    |       | 27,2     | 15      |         |        |         |         | 14      |
| D1 SC22      | ESX32  |         | 18    |       |       |          |         |         |        |         |         | 14      |
| D1 SC23      | ESX32  | 13      | 18    | 22    |       |          | 10      | 28      | 12     |         |         | 14      |
| D1 SC24      | ESX30  |         |       |       |       |          | 15      |         |        |         |         | 14      |
| D1 SC25      | ESX30  | 17      | 18    | 22    | 7     | 18       | 15      | 31,2    | 16     | 12      | 18      | 14      |
| D1 SC26      | ESX30  |         | 16    |       |       |          |         |         |        |         |         |         |
| D1 SC27      | ESX30  |         |       |       |       |          | 10      |         |        |         |         |         |
| D1 SC28      | ESX30  |         | 16    |       |       |          |         |         |        |         |         |         |
| D1 SC29      | ESX30  | 17      | 16    |       | 9,3   | 27,2     | 15      | 31,2    | 16     | 11      | 22      | 14      |
| D1 SC30      | ESX30  | 13      | 18    |       |       |          |         |         |        |         | 18      | 15      |
| D1 SC31      | ESX30  | 13      | 18    | 19    | 9,3   | 27,2     | 15      | 31,2    | 16     | 11      |         |         |
| D1 SC32      | ESX30  | 13      | 18    | 19    | 9,3   | 27,2     | 10      | 28      |        |         |         |         |
| D1 SC33      | ESX30  | 17      | 18    | 19    |       | 18       | 10      | 28      | 12     | 12      | 18      | 15      |
| D1 SC34      | ESX30  | 13      |       | 19    | 7     | 27,2     | 15      | 28      | 12     | 12      |         | 14      |
| D1 SC35      | ESX30  |         | 14    |       |       |          |         |         |        |         | 16      |         |
| D1 SC36      | ESX30  |         |       |       |       |          |         |         |        |         |         |         |
| D1 SC37      | ESX30  | 13      | 16    | 19    | 7     |          | 15      |         | 12     |         | 22      | 14      |
| D1 SC38      | ESX30  |         | 18    |       | 9,3   |          | 10      |         |        |         |         |         |
| D1 SC39      | ESX30  | 17      |       |       | 9,3   | 18       | 10      |         | 12     |         |         | 14      |
| D1 SC40      | ESX30  |         |       | 19    |       | 18       |         |         |        |         |         | 15      |
| D1 SC41      | ESX30  | 17      |       |       |       |          |         |         |        |         |         |         |
| D1 SC42      | ESX30  |         |       |       | 7     |          |         |         |        |         |         | 15      |
| D1 SC43      | ESX30  |         |       |       |       | 18       |         | 28      |        |         |         |         |
| D1 SC44      | ESX30  | 13      |       |       |       | 27,2     | 10      | 28      |        |         | 18      | 14      |
| D1 SC45      | ESX30  | 13      | 16    | 22    |       | 18       | 10      |         |        | 11      |         | 14      |
| D1 SC46      | ESX30  |         | 16    | 19    | 9,3   | 27,2     |         |         | 12     |         | 22      | 15      |
| D1 SC47      | ESX30  |         |       |       |       | 18       |         |         |        |         |         |         |
| D1 SC48      | ESX30  | 13      |       |       | 7     | 18       | 15      | 31,2    |        |         | 18      | 15      |
| D1 SC49      | ESX30  | 13      |       | 22    |       |          |         |         |        |         |         |         |
| D1 SC50      | ESX30  | 13      | 16    | 22    | 7     | 18       | 15      | 31,2    | 12     | 11      | 22      | 15      |
| D1 SC51      | ESX30  |         |       |       |       |          |         |         |        |         |         | 14      |
| D1 SC52      | ESX30  |         | 18    |       |       |          | 10      | 28      | 12     |         | 18      | 14      |

|              |           |       |       |         |     |           |       |       |       |      |       |         |
|--------------|-----------|-------|-------|---------|-----|-----------|-------|-------|-------|------|-------|---------|
| D1 SC53      | ESX30     | 17    |       | 22      |     |           | 15    | 28    | 16    | 11   | 18    | 15      |
| D1 SC54      | ESX30     | 17    | 18    |         | 9,3 | 18        | 10    | 31,2  |       | 12   | 22    | 15      |
| D1 SC55      | ESX30     | 13    | 16    | 22      | 9,3 | 27,2      |       | 31,2  |       |      | 22    |         |
| D2 Reference | ESX30     | 16/18 | 18/18 | 23/23.2 | 6/9 | 19.2/28.2 | 13/13 | 29/30 | 12/17 | 9/13 | 19/26 | 13/16.2 |
| D2_SC1       | ESX30     |       |       |         | 6   |           |       |       |       |      |       |         |
| D2_SC2       | ESX30     |       |       |         |     |           |       | 29    | 17    |      |       |         |
| D2_SC3       | ESX30     | 18    |       |         |     |           | 13    |       |       |      |       |         |
| D2_SC4       | ESX30     | 16    | 18    |         |     | 28,2      | 13    |       |       |      |       | 13      |
| D2_SC5       | ESX30     |       |       |         |     |           |       |       |       |      |       |         |
| D2_SC6       | ESX30     | 16    | 18    | 23      | 9   | 28,2      | 13    | 29    | 12    | 9    | 19    | 13      |
| D2_SC7       | ESX30     | 18    |       |         |     |           |       |       |       |      |       |         |
| D2_SC8       | ESX30     |       |       |         |     | 28,2      | 13    |       |       | 13   |       | 16,2    |
| D2_SC9       | ESX30     | 18    | 18    | 23,2    | 9   | 28,2      |       | 29    | 12    | 13   | 19    |         |
| D2_SC10      | ESX30     | 18    | 18    | 23,2    |     | 28,2      | 13    | 30    | 17    | 13   | 19    |         |
| D2_SC11      | ESX30     | 16    | 18    | 23,2    | 9   | 19,2      | 13    | 30    | 17    |      | 26    | 16,2    |
| D2_SC12      | ESX30     | 16    | 18    | 23,2    |     |           | 13    | 30    |       | 13   |       | 13      |
| D2_SC13      | ESX30     | 18    | 18    | 23,2    | 9   |           | 13    | 30    |       |      | 26    | 13      |
| D2_SC14      | ESX30     |       |       |         |     |           |       |       |       |      |       |         |
| D2_SC15      | ESX30     | 18    | 18    |         | 6   | 19,2      | 13    |       | 17    | 9    |       | 13      |
| D2_SC16      | ESX30     | 17    |       |         |     | 19,2      |       |       |       |      | 14    |         |
| D2_SC17      | ESX30     |       |       |         |     |           |       |       |       |      |       |         |
| D2_SC18      | ESX30     |       |       |         |     |           |       | 29    |       |      |       |         |
| D2_SC19      | ESX30     |       | 18    | 23      |     |           |       |       |       |      |       | 13      |
| D2_SC20      | ESX30     |       |       |         |     |           |       |       |       |      |       |         |
| D2_SC21      | ESX30     | 16    | 18    | 23      | 6   | 28,2      | 13    | 30    |       | 9    |       |         |
| D2_SC22      | ESX30     | 18    |       |         |     | 28,2      | 13    |       | 17    |      |       | 16,2    |
| D2_SC23      | ESX30     |       |       |         |     |           | 13    |       |       |      |       | 16,2    |
| D2_SC24      | ESX30     |       | 19    |         |     |           |       |       |       |      |       |         |
| D2_SC25      | ESX30     | 18    | 18    |         |     | 19,2      | 13    |       |       | 13   |       | 13      |
| D2_SC26      | ESX30     |       |       | 23,2    | 6   | 28,2      | 13    |       | 11    | 13   |       |         |
| D2_SC27      | ESX30     |       | 18    |         | 6   | 28,2      |       | 30    |       | 9    | 26    | 16,2    |
| D2_SC28      | ESX30     |       |       |         |     |           |       |       |       |      |       |         |
| D2_SC29      | ESX30     | 18    |       |         | 9   |           |       |       |       |      |       |         |
| D2_SC30      | ESX30     | 18    | 18    |         | 6   |           |       |       |       |      |       | 16,2    |
| D2_SC31      | ESX30     |       |       |         |     |           | 13    |       |       |      |       |         |
| D2_SC32      | ESX30     | 16    |       |         | 9   |           | 13    |       | 17    | 9    |       |         |
| D2_SC33      | ESX30     |       | 18    |         |     |           |       | 30    | 12    |      |       |         |
| D2_SC34      | ESX30     |       |       |         | 9   | 19,2      | 13    | 30    |       | 9    |       | 13      |
| D2_SC35      | ESX30     |       |       |         |     |           |       |       |       | 12   |       |         |
| D2_SC36      | ESX30     |       | 18    | 23,2    |     |           | 13    | 30    |       | 9    |       |         |
| D2_SC37      | ESX30     | 18    | 18    | 23,2    |     |           | 13    | 29    |       |      |       | 16,2    |
| D2_SC38      | ESX30     |       | 18    |         |     |           |       |       |       |      |       | 16,2    |
| D2_SC39      | ESX30     | 16    |       |         | 9   |           | 13    | 30    |       | 9    | 26    | 16,2    |
| D2_SC40      | ESX30     |       | 18    | 23      | 6   |           |       |       |       |      |       |         |
| D2_SC41      | ESX30     |       | 18    |         | 9   |           |       |       |       |      |       |         |
| D2_SC42      | ESX30     |       | 18    | 23,2    |     |           | 13    | 29    | 12    |      |       | 16,2    |
| D2_SC43      | ESX30     |       |       |         |     |           | 13    |       |       |      |       |         |
| D2_SC44      | ESX30     |       |       |         |     |           |       |       |       |      |       |         |
| D2_SC45      | ESX30     |       | 18    |         |     |           |       |       | 12    |      |       | 16,2    |
| D2_SC46      | ESX30     | 18    | 18    | 23      | 9   | 28,2      | 13    | 30    | 12    | 13   |       | 13      |
| D2_SC47      | ESX30     |       |       |         |     |           |       |       |       |      |       |         |
| D2_SC48      | Fusio6C30 | 18    | 18    | 23      | 9   | 19,2      | 13    |       | 17    | 13   | 19    | 13      |
| D2_SC49      | Fusio6C30 |       | 18    |         |     |           |       |       |       |      |       |         |
| D2_SC50      | Fusio6C30 | 17    | 18    | 23      | 6   | 19,2      | 13    | 30    | 17    | 13   | 19    |         |
| D2_SC51      | Fusio6C30 | 16    | 18    | 23,2    |     | 19,2      | 13    | 29    | 12    | 13   | 19    | 13      |
| D2_SC52      | Fusio6C30 | 16    | 14    | 23      |     | 19,2      | 13    | 29    | 17    | 13   | 19    |         |

|         |           |    |    |      |   |      |    |    |    |    |    |      |
|---------|-----------|----|----|------|---|------|----|----|----|----|----|------|
| D2_SC53 | Fusio6C30 | 18 | 18 | 23,2 | 6 | 19,2 |    |    |    | 9  | 19 |      |
| D2_SC54 | Fusio6C30 | 18 |    | 23   | 6 | 19,2 | 13 | 30 | 17 | 9  |    | 13   |
| D2_SC55 | Fusio6C30 |    |    | 23,2 |   |      |    |    | 12 |    |    | 13   |
| D2_SC56 | Fusio6C30 | 16 | 18 | 23   | 9 | 28,2 | 13 |    | 12 | 13 | 19 | 16,2 |
| D2_SC57 | Fusio6C30 |    |    |      |   |      | 13 |    | 12 | 13 |    |      |
| D2_SC58 | Fusio6C30 | 18 |    |      | 9 |      | 13 | 30 | 17 | 9  | 19 | 13   |
| D2_SC59 | Fusio6C30 | 16 | 18 | 23,2 | 6 |      | 13 | 29 | 12 | 9  | 26 | 16,2 |
| D2_SC60 | Fusio6C30 |    |    |      | 9 |      |    |    |    |    |    | 16,2 |
| D2_SC61 | Fusio6C30 | 18 |    | 23   | 9 |      | 13 |    |    |    |    |      |
| D2_SC62 | Fusio6C30 | 16 |    |      |   |      |    |    |    | 13 |    |      |
| D2_SC63 | Fusio6C30 | 18 | 18 | 23   | 6 |      |    | 29 | 12 | 13 |    |      |
| D2_SC64 | Fusio6C30 | 18 | 18 | 23,2 | 9 | 19,2 | 13 | 30 |    | 13 |    |      |
| D2_SC65 | Fusio6C30 | 11 | 18 | 23,2 | 6 | 28,2 | 11 | 30 | 12 | 9  | 26 | 16,2 |
| D2_SC66 | Fusio6C30 | 18 | 18 | 23,2 |   | 19,2 | 13 | 29 | 12 | 9  | 26 | 13   |
| D2_SC67 | Fusio6C30 |    |    |      |   |      |    |    |    |    |    |      |
| D2_SC68 | Fusio6C30 | 18 | 18 | 19,2 | 6 |      | 13 | 29 | 12 | 13 |    |      |

| Loci     |           |          |        |         |        |         |        |        |      |         |         |
|----------|-----------|----------|--------|---------|--------|---------|--------|--------|------|---------|---------|
| D22S1045 | D1S1656   | D10S1248 | D2S441 | D12S391 | D5S818 | D13S317 | D7S820 | CSF1PO | TPOX | Penta E | Penta D |
| 11/16    | 15.3/18.3 | 13/13    | 14/14  | 21/23   | NA     | NA      | NA     | NA     | NA   | NA      | NA      |
| 11       | 18,3      | 13       | 14     | 23      | NA     | NA      | NA     | NA     | NA   | NA      | NA      |
| 11       | 18,3      | 13       | 14     | 23      | NA     | NA      | NA     | NA     | NA   | NA      | NA      |
|          |           |          | 14     |         | NA     | NA      | NA     | NA     | NA   | NA      | NA      |
| 11       | 15,3      | 13       | 14     | 21      | NA     | NA      | NA     | NA     | NA   | NA      | NA      |
|          |           |          |        |         | NA     | NA      | NA     | NA     | NA   | NA      | NA      |
| 11       |           | 13       |        |         | NA     | NA      | NA     | NA     | NA   | NA      | NA      |
|          | 15,3      |          |        | 23      | NA     | NA      | NA     | NA     | NA   | NA      | NA      |
|          |           | 13       | 14     | 23      | NA     | NA      | NA     | NA     | NA   | NA      | NA      |
| 16       | 18,3      | 13       | 14     | 21      | NA     | NA      | NA     | NA     | NA   | NA      | NA      |
| 11       | 18,3      | 13       | 14     | 23      | NA     | NA      | NA     | NA     | NA   | NA      | NA      |
| 11       |           | 13       |        | 23      | NA     | NA      | NA     | NA     | NA   | NA      | NA      |
|          |           | 15       |        |         | NA     | NA      | NA     | NA     | NA   | NA      | NA      |
| 16       | 18,3      | 13       | 14     | 23      | NA     | NA      | NA     | NA     | NA   | NA      | NA      |
| 11       |           | 13       | 14     | 23      | NA     | NA      | NA     | NA     | NA   | NA      | NA      |
| 11       | 18,3      | 13       | 14     | 18      | NA     | NA      | NA     | NA     | NA   | NA      | NA      |
|          | 15,3      | 13       | 14     | 21      | NA     | NA      | NA     | NA     | NA   | NA      | NA      |
|          |           |          | 14     |         | NA     | NA      | NA     | NA     | NA   | NA      | NA      |
| 16       | 18,3      |          | 14     | 23      | NA     | NA      | NA     | NA     | NA   | NA      | NA      |
| 11       |           |          | 14     | 23      | NA     | NA      | NA     | NA     | NA   | NA      | NA      |
| 11       | 16,3      | 13       | 14     | 23      | NA     | NA      | NA     | NA     | NA   | NA      | NA      |
| 16       | 18,3      | 13       | 11,3   | 22      | NA     | NA      | NA     | NA     | NA   | NA      | NA      |
|          |           |          |        |         | NA     | NA      | NA     | NA     | NA   | NA      | NA      |
|          |           |          | 14     |         | NA     | NA      | NA     | NA     | NA   | NA      | NA      |
|          |           | 13       |        |         | NA     | NA      | NA     | NA     | NA   | NA      | NA      |
| 16       | 15,3      | 13       | 14     | 23      | NA     | NA      | NA     | NA     | NA   | NA      | NA      |
| 11       |           |          |        | 23      | NA     | NA      | NA     | NA     | NA   | NA      | NA      |
|          |           | 13       |        |         | NA     | NA      | NA     | NA     | NA   | NA      | NA      |
|          |           |          | 14     | 22      | NA     | NA      | NA     | NA     | NA   | NA      | NA      |
| 11       | 15,3      | 13       | 14     | 23      | NA     | NA      | NA     | NA     | NA   | NA      | NA      |
| 16       | 18,3      | 13       | 14     | 21      | NA     | NA      | NA     | NA     | NA   | NA      | NA      |
| 16       | 18,3      | 12       |        | 21      | NA     | NA      | NA     | NA     | NA   | NA      | NA      |
|          |           | 13       | 14     | 21      | NA     | NA      | NA     | NA     | NA   | NA      | NA      |
| 11       | 18,3      | 13       | 14     | 21      | NA     | NA      | NA     | NA     | NA   | NA      | NA      |
| 16       | 18,3      | 13       |        | 23      | NA     | NA      | NA     | NA     | NA   | NA      | NA      |
| 17       |           |          |        |         | NA     | NA      | NA     | NA     | NA   | NA      | NA      |
| 16       |           | 13       | 14     |         | NA     | NA      | NA     | NA     | NA   | NA      | NA      |
| 16       | 15,3      | 13       | 14     | 21      | NA     | NA      | NA     | NA     | NA   | NA      | NA      |
|          | 13        | 13       |        | 18,3    | NA     | NA      | NA     | NA     | NA   | NA      | NA      |
|          | 15,3      | 13       | 14     | 21      | NA     | NA      | NA     | NA     | NA   | NA      | NA      |
|          |           | 13       | 14     | 21      | NA     | NA      | NA     | NA     | NA   | NA      | NA      |
|          |           |          |        |         | NA     | NA      | NA     | NA     | NA   | NA      | NA      |
|          |           | 13       | 14     | 21      | NA     | NA      | NA     | NA     | NA   | NA      | NA      |
| 11       |           |          |        |         | NA     | NA      | NA     | NA     | NA   | NA      | NA      |
| 11       | 18,3      |          | 14     | 23      | NA     | NA      | NA     | NA     | NA   | NA      | NA      |
|          | 18,3      |          | 14     | 21      | NA     | NA      | NA     | NA     | NA   | NA      | NA      |
| 11       | 15,3      | 13       | 14     | 23      | NA     | NA      | NA     | NA     | NA   | NA      | NA      |
|          |           | 13       | 14     |         | NA     | NA      | NA     | NA     | NA   | NA      | NA      |
| 11       |           | 13       | 14     | 21      | NA     | NA      | NA     | NA     | NA   | NA      | NA      |
| 11       |           | 13       | 14     |         | NA     | NA      | NA     | NA     | NA   | NA      | NA      |
| 11       | 15,3      | 13       | 14     | 23      | NA     | NA      | NA     | NA     | NA   | NA      | NA      |
|          |           |          |        |         | NA     | NA      | NA     | NA     | NA   | NA      | NA      |
|          |           | 13       | 14     |         | NA     | NA      | NA     | NA     | NA   | NA      | NA      |

|       |       |       |       |       |         |         |        |         |        |       |         |
|-------|-------|-------|-------|-------|---------|---------|--------|---------|--------|-------|---------|
| 11    | 18,3  | 13    | 14    | 23    | NA      | NA      | NA     | NA      | NA     | NA    | NA      |
|       | 18,3  | 13    | 14    | 21    | NA      | NA      | NA     | NA      | NA     | NA    | NA      |
|       | 18,3  | 13    | 14    |       | NA      | NA      | NA     | NA      | NA     | NA    | NA      |
| 15/16 | 13/16 | 14/14 | 14/14 | 16/18 | !! / 13 | 11 / 12 | 9 / 11 | 11 / 12 | 9 / 12 | 5 / 7 | 11 / 13 |
|       |       |       |       |       | NA      | NA      | NA     | NA      | NA     | NA    | NA      |
| 16    |       | 14    | 14    | 18    | NA      | NA      | NA     | NA      | NA     | NA    | NA      |
| 15    | 16    | 14    | 14    |       | NA      | NA      | NA     | NA      | NA     | NA    | NA      |
| 16    |       | 14    | 13    | 18    | NA      | NA      | NA     | NA      | NA     | NA    | NA      |
| 15    |       | 14    | 14    | 16    | NA      | NA      | NA     | NA      | NA     | NA    | NA      |
| 15    | 13    | 14    | 14    | 18    | NA      | NA      | NA     | NA      | NA     | NA    | NA      |
| 15    |       | 14    |       | 18    | NA      | NA      | NA     | NA      | NA     | NA    | NA      |
| 15    |       |       | 14    | 18    | NA      | NA      | NA     | NA      | NA     | NA    | NA      |
| 16    |       | 14    | 14    | 18    | NA      | NA      | NA     | NA      | NA     | NA    | NA      |
| 16    | 13    | 14    | 14    | 18    | NA      | NA      | NA     | NA      | NA     | NA    | NA      |
| 15    | 13    | 14    |       | 18    | NA      | NA      | NA     | NA      | NA     | NA    | NA      |
|       | 16    | 14    |       | 18    | NA      | NA      | NA     | NA      | NA     | NA    | NA      |
| 16    | 16    | 14    | 14    | 16    | NA      | NA      | NA     | NA      | NA     | NA    | NA      |
| 16    |       |       |       | 18    | NA      | NA      | NA     | NA      | NA     | NA    | NA      |
| 16    | 16    |       | 14    | 18    | NA      | NA      | NA     | NA      | NA     | NA    | NA      |
|       |       | 14    |       | 16    | NA      | NA      | NA     | NA      | NA     | NA    | NA      |
| 16    |       | 14    |       |       | NA      | NA      | NA     | NA      | NA     | NA    | NA      |
|       |       |       |       |       | NA      | NA      | NA     | NA      | NA     | NA    | NA      |
|       | 16    | 14    | 14    |       | NA      | NA      | NA     | NA      | NA     | NA    | NA      |
| 16    |       |       |       |       | NA      | NA      | NA     | NA      | NA     | NA    | NA      |
| 15    | 13    | 14    | 14    | 18    | NA      | NA      | NA     | NA      | NA     | NA    | NA      |
|       |       | 14    | 14    | 16    | NA      | NA      | NA     | NA      | NA     | NA    | NA      |
| 16    |       |       | 14    |       | NA      | NA      | NA     | NA      | NA     | NA    | NA      |
| 16    | 12    | 14    |       | 18    | NA      | NA      | NA     | NA      | NA     | NA    | NA      |
|       | 16    | 14    |       | 18    | NA      | NA      | NA     | NA      | NA     | NA    | NA      |
| 15    | 16    |       |       |       | NA      | NA      | NA     | NA      | NA     | NA    | NA      |
|       | 16    | 14    | 14    | 18    | NA      | NA      | NA     | NA      | NA     | NA    | NA      |
| 16    |       |       |       |       | NA      | NA      | NA     | NA      | NA     | NA    | NA      |
|       | 16    |       |       |       | NA      | NA      | NA     | NA      | NA     | NA    | NA      |
| 16    |       |       |       |       | NA      | NA      | NA     | NA      | NA     | NA    | NA      |
|       | 14    |       | 11    |       | NA      | NA      | NA     | NA      | NA     | NA    | NA      |
| 16    |       | 14    |       | 18    | NA      | NA      | NA     | NA      | NA     | NA    | NA      |
| 16    | 13    | 14    |       | 18    | NA      | NA      | NA     | NA      | NA     | NA    | NA      |
| 16    | 13    | 14    |       | 18    | NA      | NA      | NA     | NA      | NA     | NA    | NA      |
| 15    | 16    |       |       |       | NA      | NA      | NA     | NA      | NA     | NA    | NA      |
| 16    |       |       | 14    | 16    | NA      | NA      | NA     | NA      | NA     | NA    | NA      |
| 16    |       |       |       | 18    | NA      | NA      | NA     | NA      | NA     | NA    | NA      |
| 16    |       |       |       | 18    | NA      | NA      | NA     | NA      | NA     | NA    | NA      |
| 15    | 13    | 14    | 14    | 16    | NA      | NA      | NA     | NA      | NA     | NA    | NA      |
|       |       | 14    | 14    |       | NA      | NA      | NA     | NA      | NA     | NA    | NA      |
|       |       | 14    |       | 16    | NA      | NA      | NA     | NA      | NA     | NA    | NA      |
| 15    | 16    | 14    | 14    | 18    | NA      | NA      | NA     | NA      | NA     | NA    | NA      |
|       |       |       |       | 18    | NA      | NA      | NA     | NA      | NA     | NA    | NA      |
| 15    |       |       |       |       | NA      | NA      | NA     | NA      | NA     | NA    | NA      |
| 16    |       |       |       |       | NA      | NA      | NA     | NA      | NA     | NA    | NA      |
|       |       |       | 14    | 18    | NA      | NA      | NA     | NA      | NA     | NA    | NA      |
|       | 13    |       |       | 18    | NA      | NA      | NA     | NA      | NA     | NA    | NA      |
| 16    | 13    | 14    | 14    | 18    | 11      | 12      | 11     | 12      | 9      | 7     | 11      |
|       |       |       |       |       |         |         |        |         |        |       |         |
|       | 16    | 14    | 14    | 16    | 11      | 11      | 9      | 12      | 9      | 5     | 13      |
| 15    | 13    | 14    | 14    | 16    | 13      | 11      |        | 11      |        | 5     | 11      |
|       | 16    | 14    |       | 18    | 11      |         |        | 12      |        | 5     |         |

|    |    |    |    |    |    |    |    |    |    |   |    |
|----|----|----|----|----|----|----|----|----|----|---|----|
| 16 | 16 | 14 | 14 | 18 | 13 | 12 | 11 | 11 |    | 5 | 13 |
|    | 16 | 14 | 14 | 16 | 13 | 12 |    | 11 |    | 5 |    |
|    |    |    |    |    |    | 12 |    |    |    | 7 | 11 |
| 16 | 13 | 14 | 14 | 18 | 11 | 12 | 11 | 12 | 9  | 7 | 11 |
|    | 16 |    |    |    |    | 11 | 11 | 11 |    | 7 | 11 |
| 16 | 16 | 14 | 14 |    | 13 | 11 |    | 11 |    | 7 | 11 |
|    | 16 | 14 | 14 |    | 11 |    | 9  | 11 |    | 7 | 11 |
|    |    |    | 14 |    |    |    |    |    |    |   |    |
|    | 13 |    |    | 18 |    |    |    |    |    |   |    |
|    |    |    |    |    |    |    |    | 12 |    |   | 13 |
|    | 13 |    | 14 |    |    |    |    | 11 |    |   | 13 |
| 15 | 13 | 14 | 14 | 18 | 11 | 12 | 9  |    | 9  | 7 | 13 |
| 16 | 16 | 14 | 14 | 18 |    | 11 | 11 |    | 9  | 7 | 11 |
| 16 | 13 | 14 | 14 | 16 | 11 | 11 | 9  | 12 | 12 | 7 | 11 |
|    |    |    |    |    |    |    |    | 12 |    |   |    |
| 15 | 13 | 14 | 14 | 18 |    |    | 11 | 12 | 12 |   | 13 |
